# Supplementary material
Source: MDPI journal article supplement (https://www.mdpi.com/2073-4344/11/5/616)
Supplement: s1 [file s1]

# Ionothermal Synthesis of Triclinic SAPO-34 Zeolites

Li Han <sup>1,2,\*</sup>, Xinxin Yan <sup>2</sup>, Lulu Guo <sup>2</sup>, Yanan Duan <sup>2</sup>, Zheng Wang <sup>3</sup>, Tianliang Lu <sup>2</sup>, Jun Xu <sup>2</sup>, Yuzhong Zhan <sup>2</sup> and Jianfeng Wang <sup>1,\*</sup>

<sup>1</sup> School of Ecology and Environment, Zhengzhou University, Zhengzhou 450001, China

<sup>2</sup> School of Chemical Engineering, Zhengzhou University, Zhengzhou 450001, China; xinxinyan0131@163.com (X.Y.); gllzzu@163.com (L.G.); DuanYN\_ZZU@163.com (Y.D.); lutianliang@zzu.edu.cn (T.L.); jxuzzu@sohu.com (J.X.); zhanyz@zzu.edu.cn (Y.Z.);

<sup>3</sup> State Key Laboratory of High-efficiency Utilization of Coal and Green Chemical Engineering, Institute of Chemistry and Chemical Engineering, Ningxia University, Yinchuan 750021, China; wzhang@nxu.edu.cn

\* Correspondence: lihan@zzu.edu.cn (L.H.); wangjf@zzu.edu.cn (J.W.)

**Table S1.** XRD data of different samples.

| AlPO <sub>4</sub> -34 |      | S-Si-0.1 |      | S-Si-0.3 |      | S-Si-0.5 |      |
|-----------------------|------|----------|------|----------|------|----------|------|
| 2θ                    | d    | 2θ       | d    | 2θ       | d    | 2θ       | d    |
| 9.61                  | 9.19 | 9.82     | 9.00 | 9.70     | 9.11 | 9.73     | 9.08 |
| 15.77                 | 5.61 | 15.98    | 5.54 | 15.82    | 5.59 | 15.86    | 5.58 |
| 25.74                 | 3.46 | 25.95    | 3.43 | 25.87    | 3.45 | 25.95    | 3.43 |
| 30.87                 | 2.90 | 31.05    | 2.87 | 31.02    | 2.87 | 31.01    | 2.88 |

**Table S2.** Structural parameters of SAPO-34 molecular sieves

| Sam-<br>ples | Molar<br>composition <sup>a</sup>                                         | S <sup>b</sup> <sub>BET</sub><br>(m <sup>2</sup> /g) | S <sup>c</sup> <sub>micro</sub><br>(m <sup>2</sup> /g) | S <sup>c</sup> <sub>ext</sub><br>(m <sup>2</sup> /g) | V <sup>c</sup> <sub>micro</sub><br>(cm <sup>3</sup> /g) | V <sup>d</sup> <sub>meso</sub><br>(cm <sup>3</sup> /g) | D <sup>e</sup> <sub>avg</sub><br>(nm) |
|--------------|---------------------------------------------------------------------------|------------------------------------------------------|--------------------------------------------------------|------------------------------------------------------|---------------------------------------------------------|--------------------------------------------------------|---------------------------------------|
| S-Si-0.1     | Al <sub>0.476</sub> P <sub>0.518</sub> Si <sub>0.006</sub> O <sub>2</sub> | 562.69                                               | 532.34                                                 | 30.35                                                | 0.26                                                    | 0.10                                                   | 11.50                                 |
| S-Si-0.3     | Al <sub>0.476</sub> P <sub>0.505</sub> Si <sub>0.019</sub> O <sub>2</sub> | 526.02                                               | 470.74                                                 | 55.28                                                | 0.23                                                    | 0.17                                                   | 10.35                                 |
| S-Si-0.5     | Al <sub>0.466</sub> P <sub>0.511</sub> Si <sub>0.023</sub> O <sub>2</sub> | 511.89                                               | 455.04                                                 | 56.85                                                | 0.22                                                    | 0.17                                                   | 8.28                                  |

a Measured by energy dispersive spectrometry (EDS).

b S<sub>BET</sub> (total surface area) calculated by applying the BET equation using the linear part (0.05 < P/P<sub>0</sub> < 0.30) of the adsorption isotherm.

c S<sub>micro</sub> (micropore area), S<sub>ext</sub> (external surface area) and V<sub>micro</sub> (micropore volume) calculated using the t-plot method.

d V<sub>meso</sub> (mesopore volume).

e D<sub>avg</sub> (average diameter) calculated using the BJH method (from desorption).

**Table S3.** Synthesis conditions in [EMIm]Cl

| Sample     | Raw material molar ratio                | Crystallization<br>Temperature | Crystallization<br>Time |
|------------|-----------------------------------------|--------------------------------|-------------------------|
|            |                                         |                                |                         |
| S1(150 °C) | 39[EMIm]Cl: 1TEA: 1Al: 3P: 0.7HF: 0.1Si | 150 °C                         | 48 h                    |
| S1(180 °C) | 39[EMIm]Cl: 1TEA: 1Al: 3P: 0.7HF: 0.1Si | 180 °C                         | 48 h                    |
| S1(200 °C) | 39[EMIm]Cl: 1TEA: 1Al: 3P: 0.7HF: 0.1Si | 200 °C                         | 48 h                    |
| S1-Si-0.1  | 39[EMIm]Cl: 1TEA: 1Al: 3P: 0.7HF: 0.1Si | 180 °C                         | 48 h                    |
| S1-Si-0.3  | 39[EMIm]Cl: 1TEA: 1Al: 3P: 0.7HF: 0.3Si | 180 °C                         | 48 h                    |
| S1-Si-0.5  | 39[EMIm]Cl: 1TEA: 1Al: 3P: 0.7HF: 0.5Si | 180 °C                         | 48 h                    |
| S1-F-0     | 39[EMIm]Cl: 1TEA: 1Al: 3P: 0HF: 0.1Si   | 180 °C                         | 48 h                    |
| S1-F-0.3   | 39[EMIm]Cl: 1TEA: 1Al: 3P: 0.3HF: 0.1Si | 180 °C                         | 48 h                    |
| S1-F-0.7   | 39[EMIm]Cl: 1TEA: 1Al: 3P: 0.7HF: 0.1Si | 180 °C                         | 48 h                    |
| S1-F-1.0   | 39[EMIm]Cl: 1TEA: 1Al: 3P: 1.0HF: 0.1Si | 180 °C                         | 48 h                    |
| S1-3 h     | 39[EMIm]Cl: 1TEA: 1Al: 3P: 0.7HF: 0.1Si | 180 °C                         | 3 h                     |
| S1-6 h     | 39[EMIm]Cl: 1TEA: 1Al: 3P: 0.7HF: 0.1Si | 180 °C                         | 6 h                     |
| S1-12 h    | 39[EMIm]Cl: 1TEA: 1Al: 3P: 0.7HF: 0.1Si | 180 °C                         | 12 h                    |
| S1-24 h    | 39[EMIm]Cl: 1TEA: 1Al: 3P: 0.7HF: 0.1Si | 180 °C                         | 24 h                    |
| S1-48 h    | 39[EMIm]Cl: 1TEA: 1Al: 3P: 0.7HF: 0.1Si | 180 °C                         | 48 h                    |

**Table S4.** Synthesis conditions in different ionic liquids

| Sample  | Raw material molar ratio                     | Crystallization Temperature | Crystallization Time |
|---------|----------------------------------------------|-----------------------------|----------------------|
| S-EM-C  | 39[EMIm]Cl: 1TEA: 1Al: 3P: 0.7HF: 0.1Si(op)  | 180 °C                      | 48 h                 |
| S-EM-B  | 39[EMIm]Br: 1TEA: 1Al: 3P: 0.7HF: 0.1S(op)   | 180 °C                      | 48 h                 |
| S-BM-C  | 21[BMIm]Cl: 1TEA: 1Al: 3P: 0.7HF: 0.1Si(cl)  | 180 °C                      | 48 h                 |
| S-BM-B  | 21[BMIm]Br: 1TEA: 1Al: 3P: 0.7HF: 0.1Si(cl)  | 180 °C                      | 48 h                 |
| S-EMM-B | 39[EMMIm]Br: 1TEA: 1Al: 3P: 0.7HF: 0.1Si(cl) | 180 °C                      | 48 h                 |
| S-BMM-B | 39[BMMIm]Br: 1TEA: 1Al: 3P: 0.7HF: 0.1Si(cl) | 180 °C                      | 48 h                 |

**Table S5.** Synthesis conditions in different templates

| Sample   | Raw material molar ratio                  | Crystallization Temperature | Crystallization Time |
|----------|-------------------------------------------|-----------------------------|----------------------|
| S1-T-0   | 39[EMIm]Cl: 0TEA: 1Al: 3P: 0.7HF: 0.1Si   | 180 °C                      | 48 h                 |
| S1-T-0.5 | 39[EMIm]Cl: 0.5TEA: 1Al: 3P: 0.7HF: 0.1Si | 180 °C                      | 48 h                 |
| S1-T-1.0 | 39[EMIm]Cl: 1.0TEA: 1Al: 3P: 0.7HF: 0.1Si | 180 °C                      | 48 h                 |
| S1-T-1.5 | 39[EMIm]Cl: 1.5TEA: 1Al: 3P: 0.7HF: 0.1Si | 180 °C                      | 48 h                 |
| S2-T-0   | 21[BMIm]Cl: 0TEA: 1Al: 3P: 0.7HF: 0.1Si   | 180 °C                      | 48 h                 |
| S2-T-0.5 | 21[BMIm]Cl: 0.5TEA: 1Al: 3P: 0.7HF: 0.1Si | 180 °C                      | 48 h                 |
| S2-T-1.0 | 21[BMIm]Cl: 1.0TEA: 1Al: 3P: 0.7HF: 0.1Si | 180 °C                      | 48 h                 |
| S2-T-1.5 | 21[BMIm]Cl: 1.5TEA: 1Al: 3P: 0.7HF: 0.1Si | 180 °C                      | 48 h                 |
| S2-TME   | 21[BMIm]Cl: 1TEA: 1Al: 3P: 0.7HF: 0.1Si   | 180 °C                      | 48 h                 |
| S2-DEA   | 21[BMIm]Cl: 1DEA: 1Al: 3P: 0.7HF: 0.1Si   | 180 °C                      | 48 h                 |
| S2-MOR   | 21[BMIm]Cl: 1MOR: 1Al: 3P: 0.7HF: 0.1Si   | 180 °C                      | 48 h                 |
| S2-N-MIM | 21[BMIm]Cl: 1N-MIM: 1Al: 3P: 0.7HF: 0.1Si | 180 °C                      | 48 h                 |
| S2-TEAOH | 21[BMIm]Cl: 1TEAOH: 1Al: 3P: 0.7HF: 0.1Si | 180 °C                      | 48 h                 |

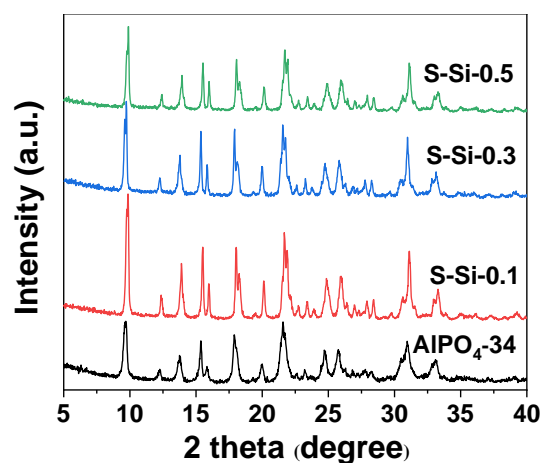

Figure S1. XRD patterns of samples under different molar amounts of Si.

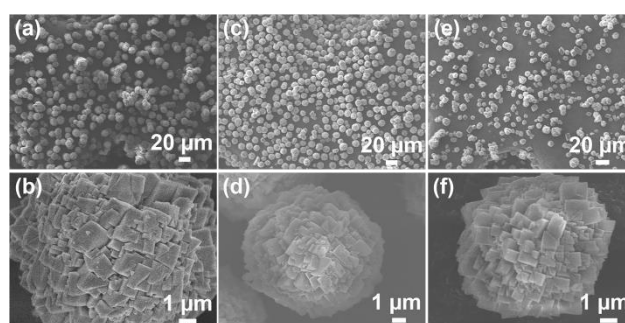

Figure S2. SEM images of samples under different molar amounts of Si (a, b for S-Si-0.1, c, d for S-Si-0.3, and e, f for S-Si-0.5).

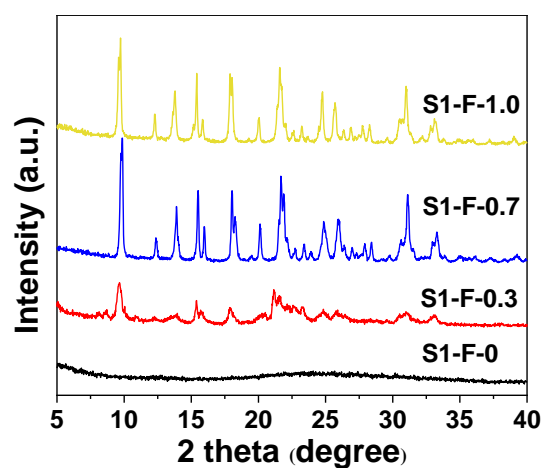

Figure S3. XRD patterns of samples under different molar amounts of HF.

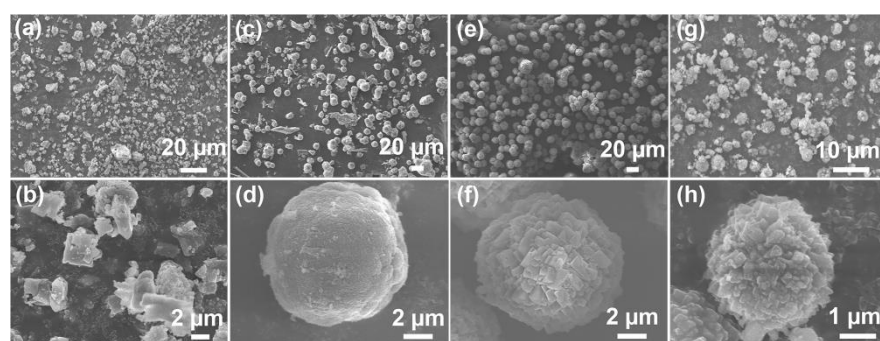

**Figure S4.** SEM images of samples under different molar amounts of HF (a, b for S1-F-0, c, d for S1-F-0.3, e, f for S1-F-0.7, and g, h for S1-F-1.0).

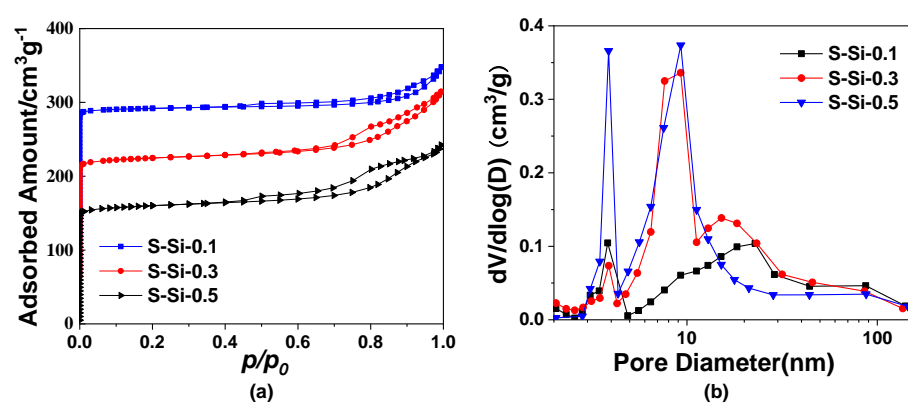

**Figure S5.** (a) N<sub>2</sub> adsorption-desorption isotherms and (b) BJH pore size distributions of triclinic SAPO-34 molecular sieves.

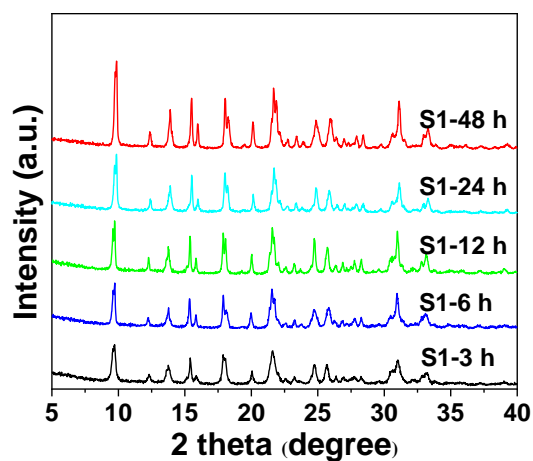

**Figure S6.** XRD patterns of samples at different crystallization times.

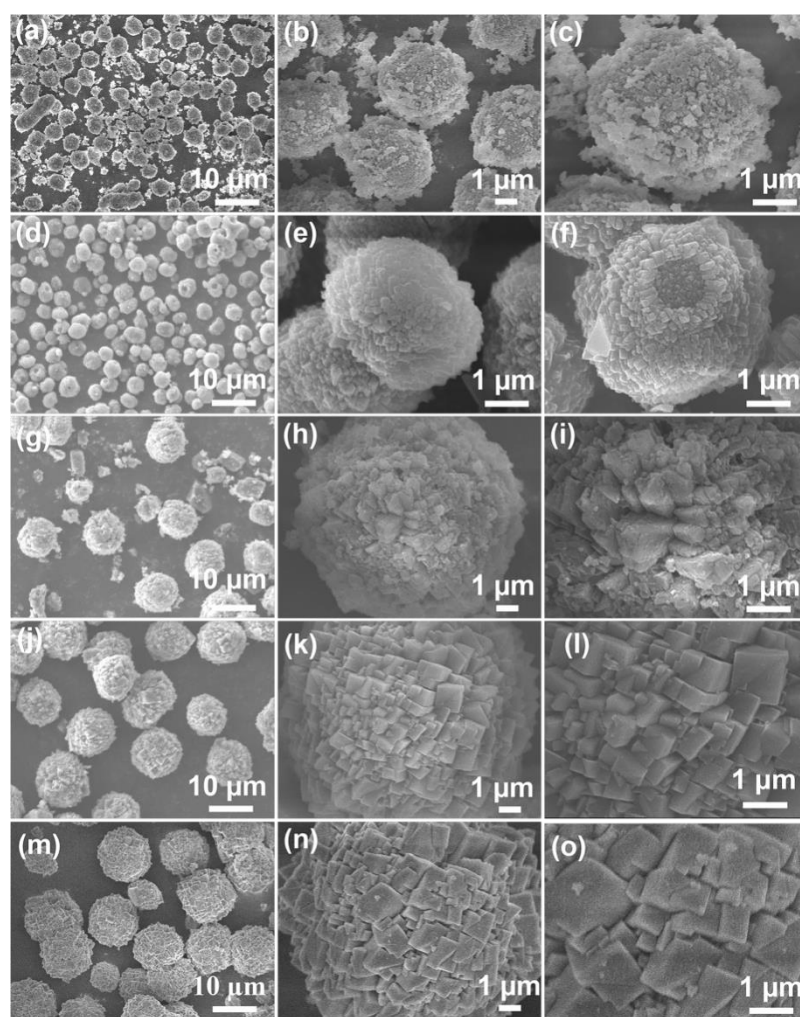

**Figure S7.** SEM images of samples at different crystallization times (a~c for S1-3 h, d~f for S1-6 h, g~i for S1-12 h, j~l for S1-24 h, and m~o for S1-48 h).

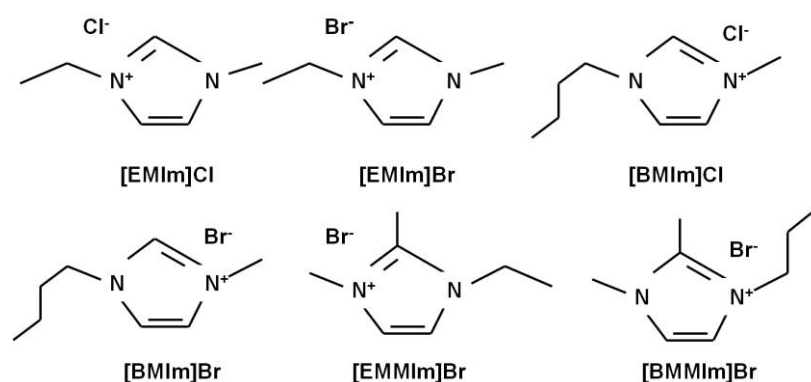

**Figure S8.** Structure of ionic liquids.

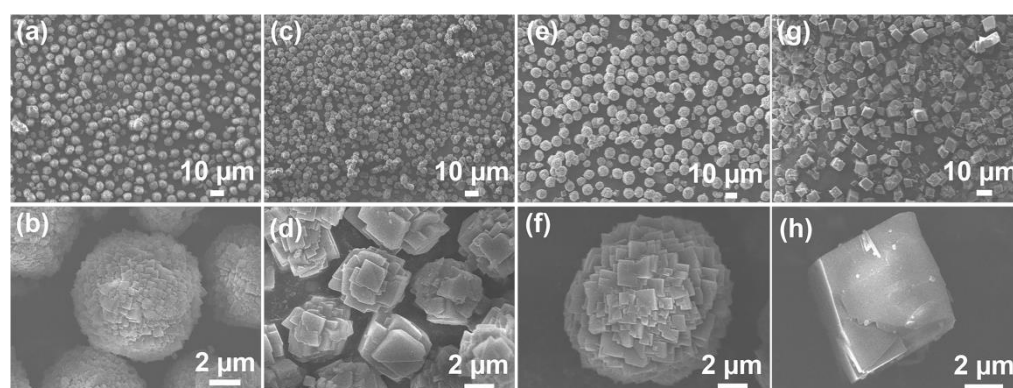

**Figure S9.** SEM images of samples under different molar amounts of TEA (a, b for S1-T-0, c, d for S1-T-0.5, e, f for S1-T-1.0, and g, h for S1-T-1.5).

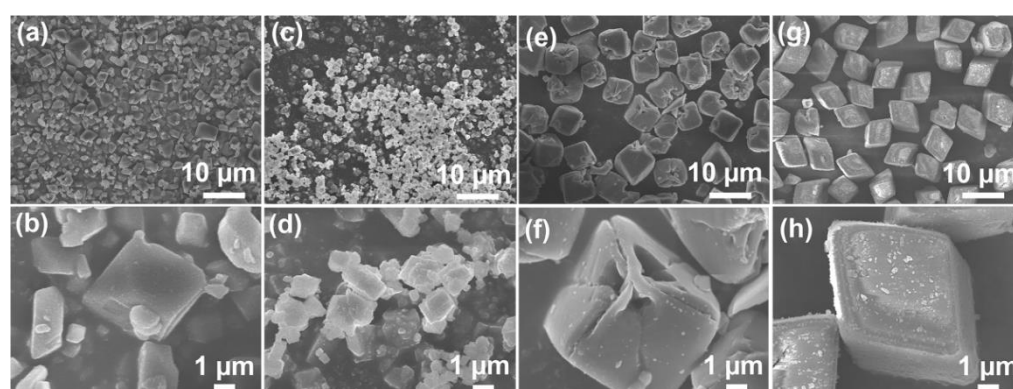

**Figure S10.** SEM images of samples at different molar amounts of TEA (a, b for S2-T-0, c, d for S2-T-0.5, e, f for S2-T-1.0, and g, h for S2-T-1.5).

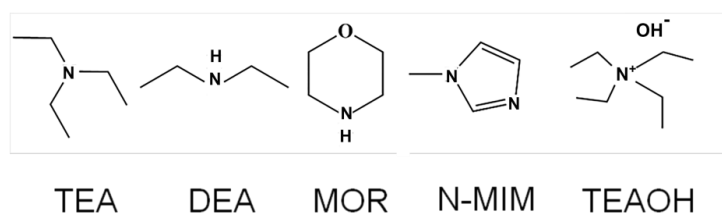

**Figure S11.** Structure of different templating agents.

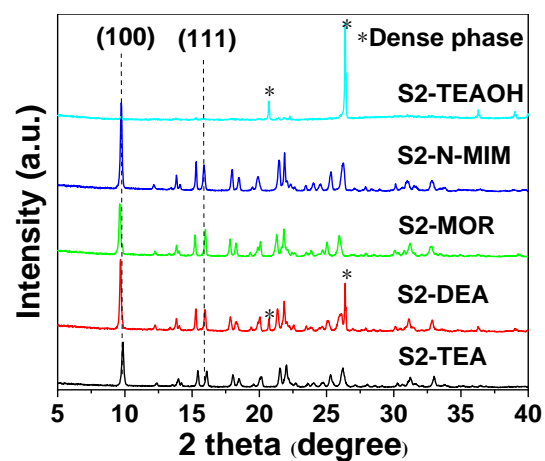

**Figure S12.** XRD patterns of samples under different types of template.



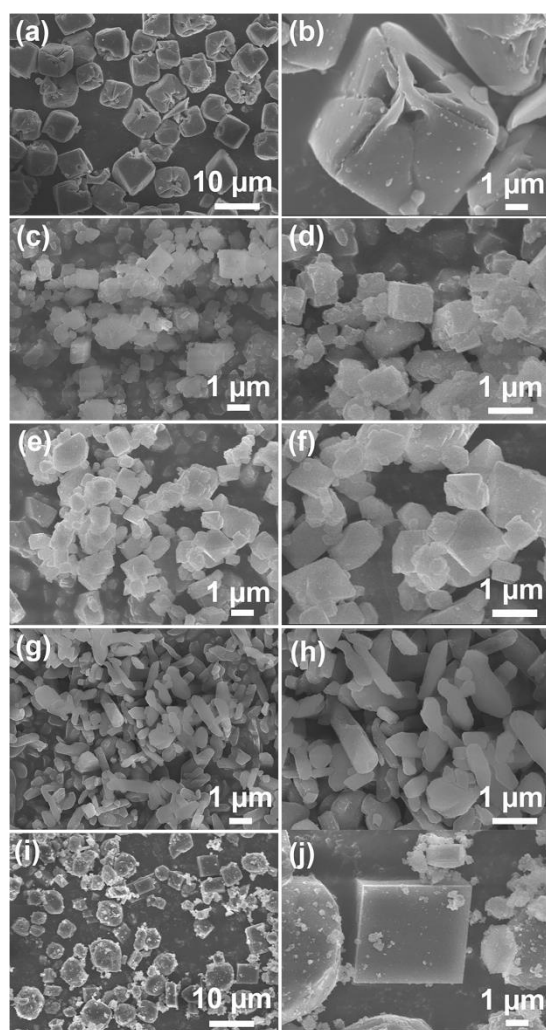

**Figure S13.** SEM images of samples under different types of template (a, b for S2-TEA, c, d for S2-DME, e, f for S2-MOR, g, h for S2-N-MIM, and i, j for S2-TEAOH).

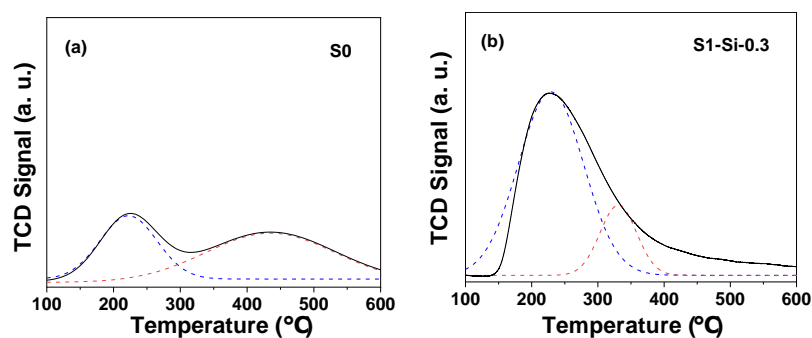

**Figure S14.** NH<sub>3</sub>-TPD patterns of SAPO-34 molecular sieves.
